# Supplementary material for: Long-range heterochromatin association is mediated by silencing and double-strand DNA break repair proteins
Source: PubMed Central journal article supplement — J Cell Biol. 2013 Jun 10;201(6):809–26. doi: 10.1083/jcb.201211105 (PMC3678155; doi:10.1083/jcb.201211105), 2013-06-10
Supplement: supp_jcb.201211105_JCB_201211105_sm.pdf [file supp_jcb.201211105_JCB_201211105_sm.pdf]

Kirkland and Kamakaka, <http://www.jcb.org/cgi/content/full/jcb.201211105/DC1>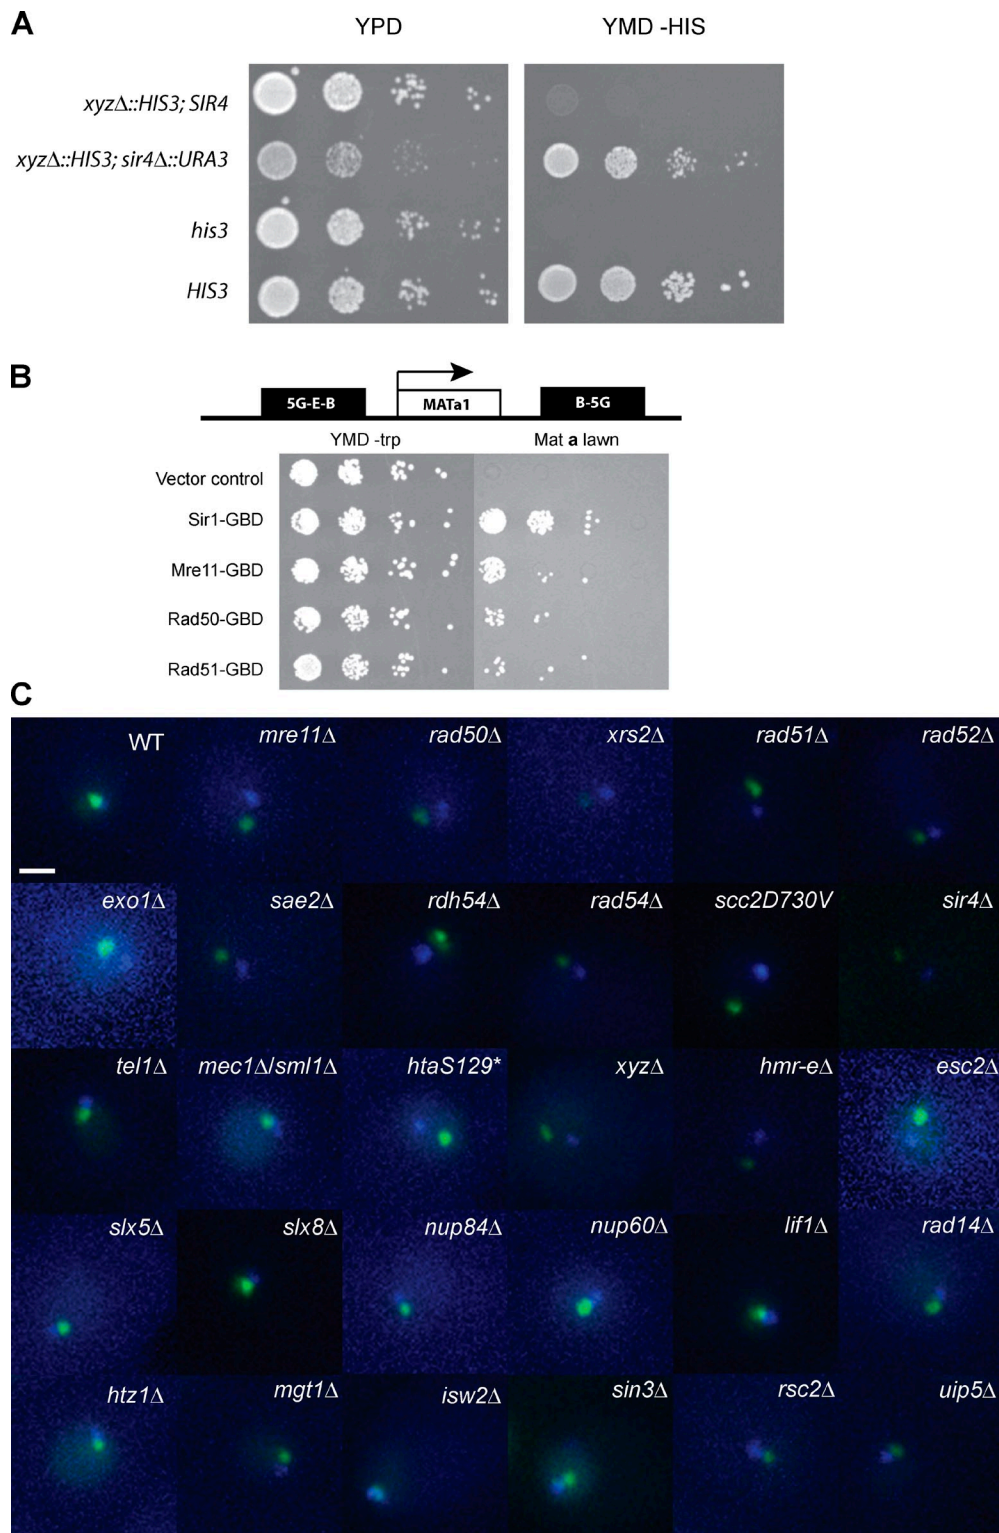

Figure S1. **Silencing controls and representative two-dot assay images.** (A) Silencing in the *xyzΔ* strain is maintained. Serial dilutions of strains spotted onto YPD growth control (top) or YMD plates lacking histidine (bottom) to assay for silencing of the *HIS3* gene inserted in place of the *XYZ* sequence in the heterochromatic region of *HMR*. A strain containing *HIS3* at the *XYZ* locus in a *sir4Δ* background is used as a control for lack of silencing of *HIS3*. Strains containing the *HIS3* gene or containing a *his3-1* mutation at the native *HIS3* locus are used as additional controls. (B) DSB repair proteins and tethered silencing Schematic of constructs containing *5G-E-B* at *HMRE* and *B-5G* at *HMR-I* flanking the *MATa1* gene. 10-fold serial dilutions on YMD-Trp (growth control) and an a strain lawn (silencing) in an otherwise  $\alpha$  strain WT background. Growth signifies silencing of the otherwise active *MATa1* gene. (C) Representative two-dot images. Representative images from WT and mutants in trans-factor assayed in this study. GBD, Gal4 DNA binding domain. Bar, 1,000 nm.

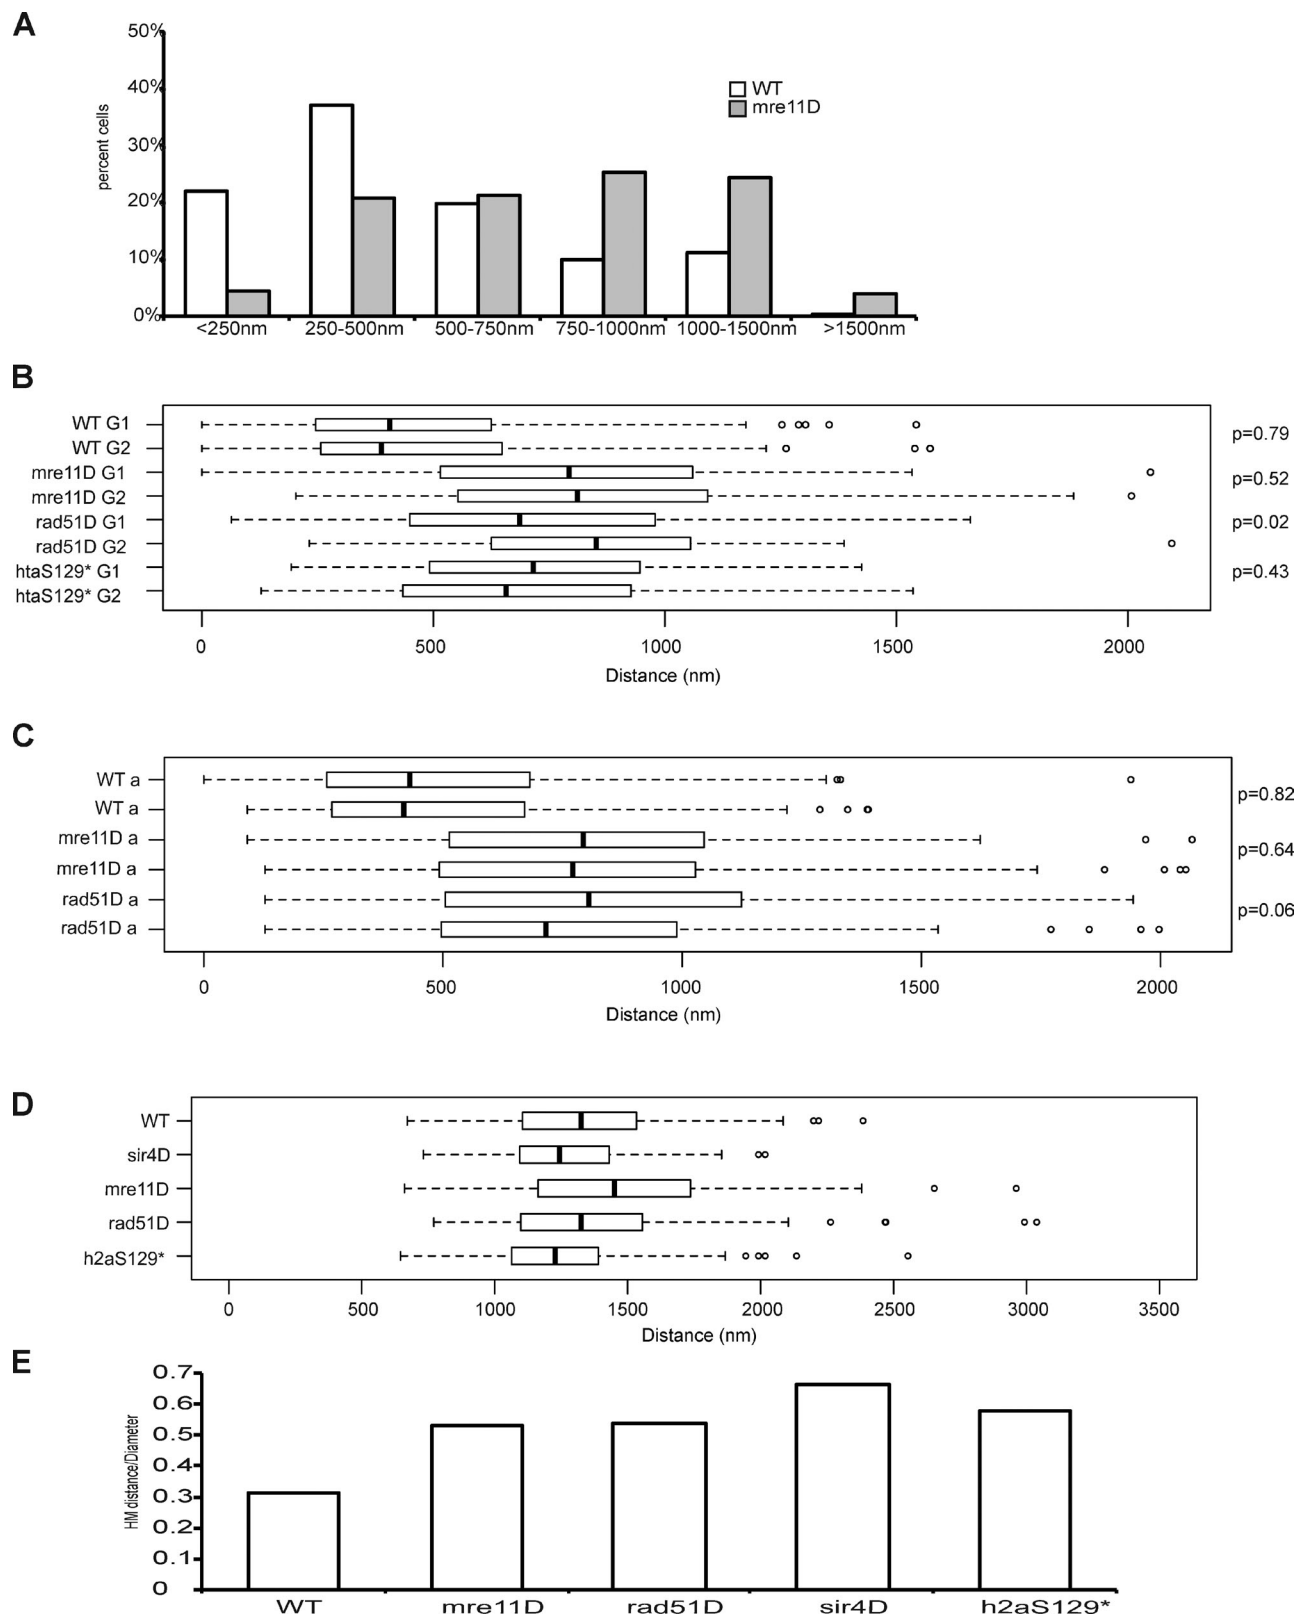

Figure S2. **Controls for HM proximity measurements.** (A) Bar graphs of WT and *mre11Δ* strains (from Fig. 4 A), in which the distance between *HML* and *HMR* are binned into categories of specific distances from two independent strains and three independent trials. Data from each trial was pooled and binned as previously described (Miele et al., 2009); therefore, error bars are not included. (B) Boxplots of the distance between TetR-YFP and CFP-LacI foci in cells of a given strain scored by bud index. Unbudded cells were considered in G1, and budded cells were considered in S/G2. (WT G1,  $n = 192$ ; WT G2,  $n = 136$ ; *mre11Δ* G1,  $n = 103$ ; *mre11Δ* G2,  $n = 93$ ; *rad51Δ* G1,  $n = 157$ ; *rad51Δ* G2,  $n = 105$ ; *htaS129\** G1,  $n = 148$ ; and *htaS129\** G2,  $n = 106$ ). P-values were calculated using a Mann-Whitney U test (Wilcoxon test) in R. (WT data are the same as presented in Fig. 1 B and are included here to simplify comparison). Data are combined from at least two independent trials. (C) Boxplots of the distance between TetR-YFP and CFP-LacI foci in cells of a given strain in either *MATa* or *MATα* cells. (WTa,  $n = 153$ ; WTα,  $n = 152$ ; *mre11Δa*,  $n = 221$ ; *mre11Δα*,  $n = 222$ ; *rad51Δa*,  $n = 282$ ; and *mre11Δα*,  $n = 289$ ). P-values were calculated using a Mann-Whitney U test (Wilcoxon test) in R. (D) Boxplots of the distribution of diameters of a given strain. Data presented in B–D are measurements from at least two independent trials. (E) Bar graph of the (median distance of *HM* [from Fig. 4]) / (median diameter [from D]) of a given strain. Error bars are not given, as data are simply a ratio of two median measurements. The boxes represent the middle 50% of data points with the black lines showing the median of distances. Outliers are defined as distances >1.5 times the interquartile range (dashed lines) and are represented by open circles.

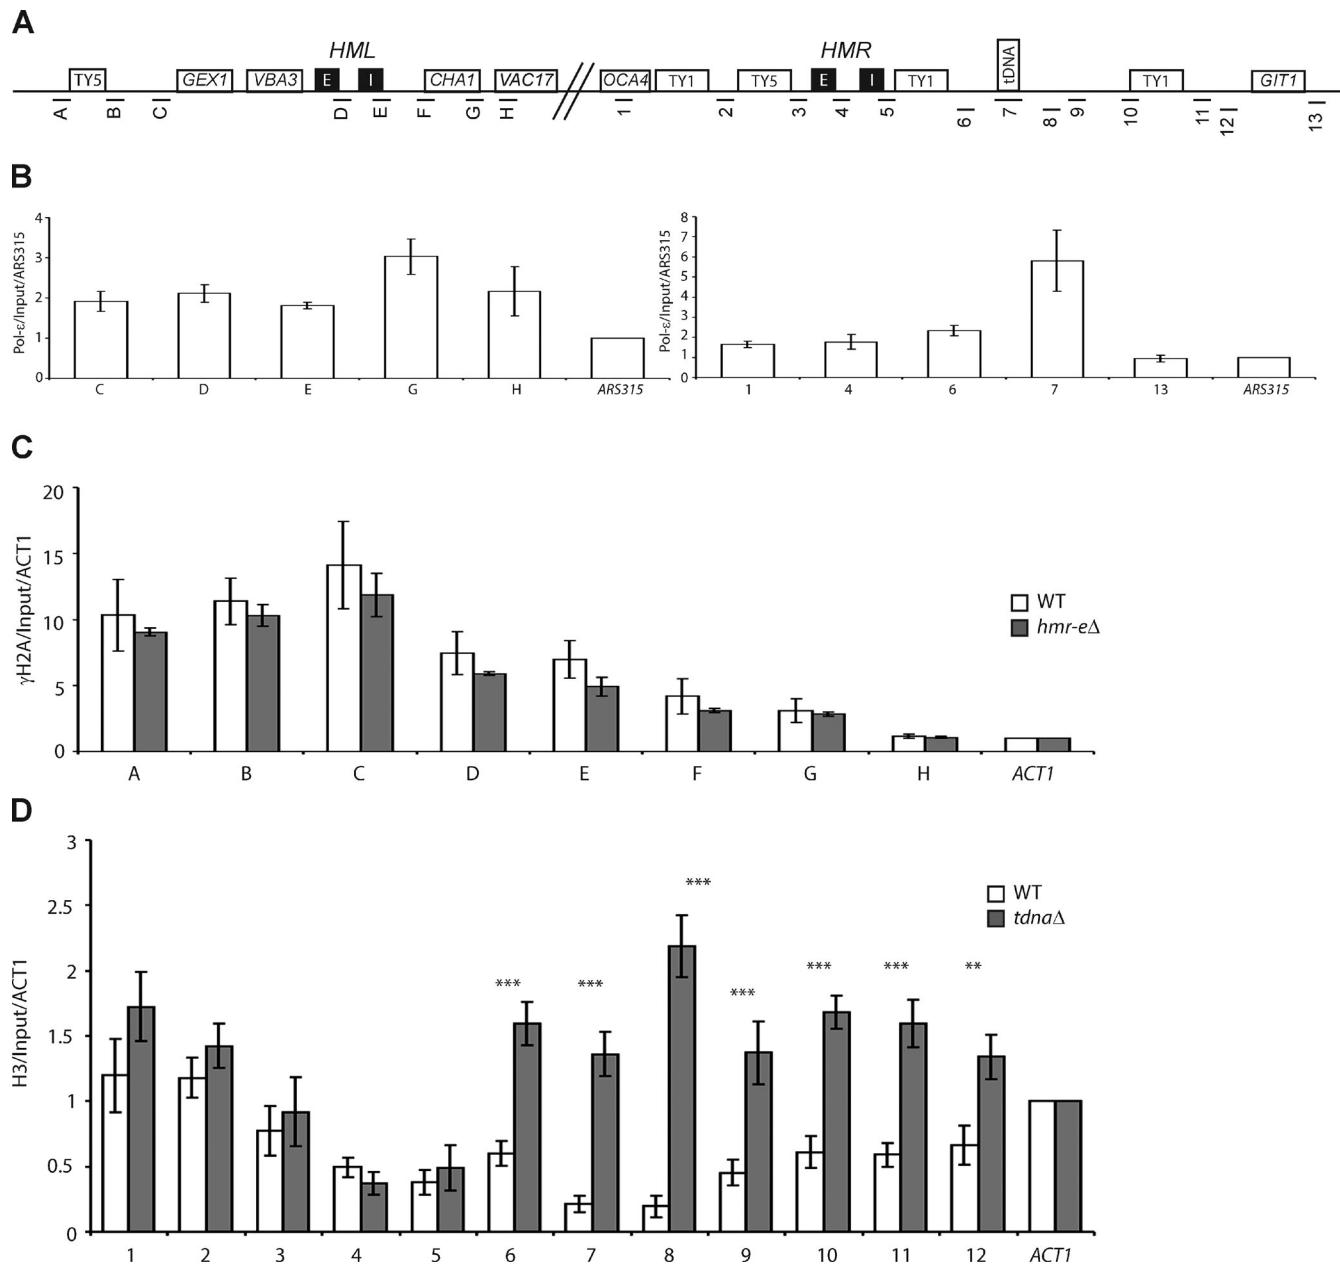

Figure S3. **ChIP at HM loci.** (A) Schematic of qPCR amplicons at *HMR* and *HML*. (B) ChIP-qPCR plots of Pol- $\epsilon$  enrichment normalized to *ARS315* at *HMR* and *HML*. Plots are a mean of at least two independent cross-links and four IPs. Error bars are standard deviation from the mean. (C) ChIP-qPCR plots of  $\gamma$ H2A enrichment at the *HML* locus in an *hmr-e $\Delta$*  strain. (D) ChIP-qPCR plots of H3 enrichment at the *HMR* locus in an *t(AUG)C $\Delta$*  strain. Plots are a mean of three cross-links and six IPs. All amplicons normalized to the *ACT1* locus. WT data are the same as in Fig. 6 and are included for ease of comparison. Error bars are standard deviation from the mean. P-values by *t* test are assigned as \*\*\*,  $P < 0.001$ ; \*\*,  $P < 0.01$ ; and \*,  $P < 0.05$ .

Table S1. Yeast strains used in this study

| ROY No.           | Genotype                                                                                                                                                                                             | Experiment                                |
|-------------------|------------------------------------------------------------------------------------------------------------------------------------------------------------------------------------------------------|-------------------------------------------|
| ROY1685           | <i>MAT<math>\alpha</math></i> <i>HMR(s288c)</i> <i>ADE2</i> <i>his3</i> <i>leu2</i> <i>lys2</i> <i>trp1</i>                                                                                          | ChIP                                      |
| ROY1681           | <i>MAT<math>\alpha</math></i> <i>HMR(s288c)</i> <i>ADE2</i> <i>tI[AGU]C<math>\Delta</math></i> <i>his3</i> <i>leu2</i> <i>lys2</i> <i>trp1</i> <i>ura3</i>                                           | ChIP                                      |
| ROY4819/20        | <i>MAT<math>\alpha</math></i> <i>HMR(s288c)</i> <i>e<math>\Delta</math>::URA3</i> <i>ADE</i> <i>his3</i> <i>leu2</i> <i>lys2</i> <i>trp1</i>                                                         | ChIP                                      |
| ROY4821/22        | <i>MAT<math>\alpha</math></i> <i>HMR(s288c)</i> <i>Pol-e-HA::LEU2</i> <i>lys2</i> <i>ADE2</i> <i>his3</i> <i>lys2</i> <i>trp1</i> <i>ura3</i>                                                        | ChIP                                      |
| ROY4825           | <i>MAT<math>\alpha</math></i> <i>HMR(s288c)</i> <i>SCC2-13xmyc::KanMx</i> <i>ADE2</i> <i>his3</i> <i>leu2</i> <i>lys2</i> <i>trp1</i> <i>ura3</i>                                                    | ChIP                                      |
| ROY4826           | <i>MAT<math>\alpha</math></i> <i>HMR(s288c)</i> <i>SCC2-13xmyc::KanMx</i> <i>ADE2</i> <i>hta1S129*</i> <i>hta2S129*</i> <i>his3</i> <i>leu2</i> <i>lys2</i> <i>trp1</i> <i>ura3</i>                  | ChIP                                      |
| ROY4923/24        | <i>MAT<math>\alpha</math></i> <i>HMR(s288c)</i> <i>SMC6-TAP::HIS3</i> <i>HMR::S288c</i> <i>ADE2</i> <i>lys2</i>                                                                                      | ChIP                                      |
| ROY4925/26        | <i>MAT<math>\alpha</math></i> <i>HMR(s288c)</i> <i>Mcd1-13xmyc::KanMx</i> <i>ADE2</i>                                                                                                                | ChIP                                      |
| ROY4927/28        | <i>MAT<math>\alpha</math></i> <i>HMR(s288c)</i> <i>BRN1-HA::KanMx</i> <i>ADE</i>                                                                                                                     | ChIP                                      |
| BYS48/<br>ROY4830 | <i>MAT<math>\alpha</math>/a</i> <i>HML-tetO::LEU2</i> <i>HMR-LacO::TRP1</i> <i>CFP-Lacl tetR-YFP::ADE2</i> <i>LYS2</i>                                                                               | Two-dot microscopy;<br>Miele et al., 2009 |
| ROY4831/32        | <i>MAT<math>\alpha</math>/a</i> <i>HML-tetO::LEU2</i> <i>HMR-LacO::TRP1</i> <i>CFP-Lacl tetR-YFP::ADE2</i> <i>mre11<math>\Delta</math>::HIS3</i> <i>LYS</i>                                          | Two-dot microscopy                        |
| ROY4833/34        | <i>MAT<math>\alpha</math></i> <i>HML-tetO::LEU2</i> <i>HMR-LacO::TRP1</i> <i>CFP-Lacl tetR-YFP::ADE2</i> <i>e<math>\Delta</math>::URA3</i> <i>LYS2</i>                                               | Two-dot microscopy                        |
| ROY4835/36        | <i>MAT<math>\alpha</math></i> <i>HML-tetO::LEU2</i> <i>HMR-LacO::TRP1</i> <i>CFP-Lacl tetR-YFP::ADE2</i> <i>xyz<math>\Delta</math>::HIS3</i>                                                         | Two-dot microscopy                        |
| ROY4837           | <i>MAT<math>\alpha</math></i> <i>HML-tetO::LEU2</i> <i>leu2-1::LacO(63x)::LEU2</i> <i>hmr<math>\Delta</math>::URA3</i> <i>CFP-Lacl tetR-YFP::ADE2</i>                                                | Two-dot microscopy                        |
| ROY4838           | <i>MAT<math>\alpha</math></i> <i>HML-tetO::LEU2</i> <i>leu2-1::LacO(63x)::HMR::LEU2</i> <i>hmr<math>\Delta</math>::URA3</i> <i>CFP-Lacl tetR-YFP::ADE2</i>                                           | Two-dot microscopy                        |
| ROY4839/40        | <i>MAT<math>\alpha</math></i> <i>HML-tetO::LEU2</i> <i>leu2-1::LacO(63x)::HMR::LEU2</i> <i>hmr<math>\Delta</math>::URA3</i> <i>CFP-Lacl tetR-YFP::ADE2</i> <i>sir4<math>\Delta</math>::KanMx</i>     | Two-dot microscopy                        |
| ROY4841           | <i>MAT<math>\alpha</math></i> <i>HML-tetO::LEU2</i> <i>CFP-Lacl tetR-YFP::ADE2</i> <i>LacO(63x)::ChrVI-R::LEU2</i> <i>hmr<math>\Delta</math>::URA3</i> <i>LYS2</i>                                   | Two-dot microscopy                        |
| ROY4842           | <i>MAT<math>\alpha</math></i> <i>HML-tetO::LEU2</i> <i>CFP-Lacl tetR-YFP::ADE2</i> <i>LacO(63x)::ChrVI-L::LEU2</i> <i>hmr<math>\Delta</math>::URA3</i> <i>LYS2</i>                                   | Two-dot microscopy                        |
| ROY4843           | <i>MAT<math>\alpha</math></i> <i>HML-tetO::LEU2</i> <i>CFP-Lacl tetR-YFP::ADE2</i> <i>LacO(63x)::ChrVI-R::HMR::LEU2</i> <i>hmr<math>\Delta</math>::URA3</i> <i>LYS2</i>                              | Two-dot microscopy                        |
| ROY4844           | <i>MAT<math>\alpha</math></i> <i>HML-tetO::LEU2</i> <i>CFP-Lacl tetR-YFP::ADE2</i> <i>LacO(63x)::ChrVI-L::HMR::LEU2</i> <i>hmr<math>\Delta</math>::URA3</i> <i>LYS2</i>                              | Two-dot microscopy                        |
| ROY4929/30        | <i>MAT<math>\alpha</math>/a</i> <i>LacO(63x)::ChrVI-16kb::LEU2</i> <i>LacO963x)::ChrVI-207kb::LEU2</i> <i>hmrD::URA3</i> <i>LacI-GFP::ADE2</i>                                                       | Two-dot microscopy                        |
| ROY4931/32        | <i>MAT<math>\alpha</math>/a</i> <i>LacO(63x)::ChrVI-16kb::HML::LEU2</i> <i>LacO(63x)::ChrVI-207kb::HMR::LEU2</i> <i>hmrD::URA3</i> <i>LacI-GFP::ADE2s</i>                                            | Two-dot microscopy                        |
| ROY4849/50        | <i>MAT<math>\alpha</math>/a</i> <i>HML-tetO::LEU2</i> <i>HMR-LacO::TRP1</i> <i>CFP-Lacl tetR-YFP::ADE2</i> <i>scc2-D730V::HYG</i>                                                                    | Two-dot microscopy                        |
| ROY4851/52        | <i>MAT<math>\alpha</math>/a</i> <i>HML-tetO::LEU2</i> <i>HMR-LacO::TRP1</i> <i>CFP-Lacl tetR-YFP::ADE2</i> <i>rad14<math>\Delta</math>::LEU2</i>                                                     | Two-dot microscopy                        |
| ROY4853/54        | <i>MAT<math>\alpha</math></i> <i>HML-tetO::LEU2</i> <i>HMR-LacO::TRP1</i> <i>CFP-Lacl tetR-YFP::ADE2</i> <i>LYS2</i> <i>lif1<math>\Delta</math>::KanMX</i>                                           | Two-dot microscopy                        |
| ROY4855/56        | <i>MAT<math>\alpha</math>/a</i> <i>HML-tetO::LEU2</i> <i>HMR-LacO::TRP1</i> <i>CFP-Lacl tetR-YFP::ADE2</i> <i>rad51<math>\Delta</math>::HIS3</i> <i>LYS</i>                                          | Two-dot microscopy                        |
| ROY4859/60        | <i>MAT</i> <i>HML-tetO::LEU2</i> <i>HMR-LacO::TRP1</i> <i>CFP-Lacl tetR-YFP::ADE2</i> <i>sir4<math>\Delta</math>::URA3</i> <i>lys-</i>                                                               | Two-dot microscopy                        |
| ROY4861/62        | <i>MAT<math>\alpha</math></i> <i>HML-tetO::LEU2</i> <i>HMR-LacO::TRP1</i> <i>CFP-Lacl tetR-YFP::ADE2</i> <i>LYS2</i> <i>exo1<math>\Delta</math>::KanMX</i>                                           | Two-dot microscopy                        |
| ROY4863           | <i>MAT<math>\alpha</math></i> <i>HML-tetO::LEU2</i> <i>HMR-LacO::TRP1</i> <i>CFP-Lacl tetR-YFP::ADE2</i> <i>rad50<math>\Delta</math>::TRP1</i> <i>LYS</i>                                            | Two-dot microscopy                        |
| ROY4864           | <i>MAT<math>\alpha</math></i> <i>HML-tetO::LEU2</i> <i>HMR-LacO::TRP1</i> <i>CFP-Lacl tetR-YFP::ADE2</i> <i>LYS2</i> <i>sae2<math>\Delta</math>::KanMX</i>                                           | Two-dot microscopy                        |
| ROY4865           | <i>MAT<math>\alpha</math></i> <i>HML-tetO::LEU2</i> <i>HMR-LacO::TRP1</i> <i>CFP-Lacl tetR-YFP::ADE2</i> <i>xrs2<math>\Delta</math>::LEU2</i> <i>LYS</i>                                             | Two-dot microscopy                        |
| ROY4866/67        | <i>MAT<math>\alpha</math></i> <i>HML-tetO::LEU2</i> <i>HMR-LacO::TRP1</i> <i>CFP-Lacl tetR-YFP::ADE2</i> <i>rdh54<math>\Delta</math>::KanMX</i> <i>LYS</i>                                           | Two-dot microscopy                        |
| ROY4868/69        | <i>MAT<math>\alpha</math></i> <i>HML-tetO::LEU2</i> <i>HMR-LacO::TRP1</i> <i>CFP-Lacl tetR-YFP::ADE2</i> <i>rad54<math>\Delta</math>::KanMX</i> <i>LYS</i>                                           | Two-dot microscopy                        |
| ROY4870/71        | <i>Mata/a</i> <i>HML-tetO::LEU2</i> <i>HMR-LacO::TRP1</i> <i>CFP-Lacl tetR-YFP::ADE2</i> <i>esc2<math>\Delta</math>::HIS3</i> <i>lys2</i>                                                            | Two-dot microscopy                        |
| ROY4872/73        | <i>MAT<math>\alpha</math></i> <i>HML-tetO::LEU2</i> <i>HMR-LacO::TRP1</i> <i>CFP-Lacl tetR-YFP::ADE2</i> <i>rad52<math>\Delta</math>::KanMX</i> <i>LYS</i>                                           | Two-dot microscopy                        |
| ROY4876/77        | <i>MAT<math>\alpha</math></i> <i>HML-tetO::LEU2</i> <i>HMR-LacO::TRP1</i> <i>CFP-Lacl tetR-YFP::ADE2</i> <i>LYS2</i> <i>tel1<math>\Delta</math>::KanMX</i>                                           | Two-dot microscopy                        |
| ROY4878/79        | <i>MAT<math>\alpha</math></i> <i>HML-tetO::LEU2</i> <i>HMR-LacO::TRP1</i> <i>CFP-Lacl tetR-YFP::ADE2</i> <i>mec1<math>\Delta</math>::HIS3</i> <i>smf1<math>\Delta</math>::KanMX</i>                  | Two-dot microscopy                        |
| ROY4880/81        | <i>MAT<math>\alpha</math>/a</i> <i>HML-tetO::LEU2</i> <i>HMR-LacO::TRP1</i> <i>CFP-Lacl tetR-YFP::ADE2</i> <i>LYS</i> <i>hta1S129*</i> <i>hta2S129*</i>                                              | Two-dot microscopy                        |
| ROY4882/83        | <i>MAT<math>\alpha</math></i> <i>HML-tetO::LEU2</i> <i>HMR-LacO::TRP1</i> <i>CFP-Lacl tetR-YFP::ADE2</i> <i>nup60<math>\Delta</math>::KanMX</i> <i>LYS</i>                                           | Two-dot microscopy                        |
| ROY4884/85        | <i>MAT<math>\alpha</math></i> <i>HML-tetO::LEU2</i> <i>HMR-LacO::TRP1</i> <i>CFP-Lacl tetR-YFP::ADE2</i> <i>LYS2</i> <i>slx5<math>\Delta</math>::KanMX</i>                                           | Two-dot microscopy                        |
| ROY4886/87        | <i>MAT<math>\alpha</math>/a</i> <i>HML-tetO::LEU2</i> <i>HMR-LacO::TRP1</i> <i>CFP-Lacl tetR-YFP::ADE2</i> <i>LYS2</i> <i>nup84<math>\Delta</math>::KanMX</i>                                        | Two-dot microscopy                        |
| ROY4888/89        | <i>MAT<math>\alpha</math></i> <i>HML-tetO::LEU2</i> <i>HMR-LacO::TRP1</i> <i>CFP-Lacl tetR-YFP::ADE2</i> <i>LYS2</i> <i>slx8<math>\Delta</math>::KanMX</i>                                           | Two-dot microscopy                        |
| ROY4894/95        | <i>MAT<math>\alpha</math></i> <i>YIPlac-HDEL-dsRED::NatMx</i> <i>HMR-GIT1-LacO(256x)::TRP</i> <i>LacI-GFP::ADE2</i> <i>RECR::LEU2</i> <i>ura3</i> <i>his3</i> <i>rad51<math>\Delta</math>::KanMx</i> | Zone analysis                             |
| ROY4896/97        | <i>MAT<math>\alpha</math></i> <i>YIPlac-HDEL-dsRED::NatMx</i> <i>HMR-GIT1-LacO(256x)::TRP</i> <i>LacI-GFP::ADE2</i> <i>RECR::LEU2</i> <i>ura3</i> <i>his3</i> <i>mre11<math>\Delta</math>::KanMx</i> | Zone analysis                             |
| ROY4898/99        | <i>MAT<math>\alpha</math>/a</i> <i>HML-tetO::LEU2</i> <i>HMR-LacO::TRP1</i> <i>CFP-Lacl tetR-YFP::ADE2</i> <i>LYS2</i> <i>rsc2<math>\Delta</math>::KanMX</i>                                         | Two-dot microscopy                        |
| ROY4900/01        | <i>MAT<math>\alpha</math>/a</i> <i>HML-tetO::LEU2</i> <i>HMR-LacO::TRP1</i> <i>CFP-Lacl tetR-YFP::ADE2</i> <i>isw2<math>\Delta</math>::KanMX</i> <i>LYS</i>                                          | Two-dot microscopy                        |
| ROY4902/03        | <i>MAT<math>\alpha</math></i> <i>HML-tetO::LEU2</i> <i>HMR-LacO::TRP1</i> <i>CFP-Lacl tetR-YFP::ADE2</i> <i>mgmt1<math>\Delta</math>::KanMX</i> <i>LYS</i>                                           | Two-dot microscopy                        |
| ROY4904/05        | <i>MAT<math>\alpha</math></i> <i>HML-tetO::LEU2</i> <i>HMR-LacO::TRP1</i> <i>CFP-Lacl tetR-YFP::ADE2</i> <i>uip5<math>\Delta</math>::KanMX</i> <i>LYS</i>                                            | Two-dot microscopy                        |
| ROY4906/07        | <i>MAT<math>\alpha</math>/a</i> <i>HML-tetO::LEU2</i> <i>HMR-LacO::TRP1</i> <i>CFP-Lacl tetR-YFP::ADE2</i> <i>sin3<math>\Delta</math>::KanMx</i>                                                     | Two-dot microscopy                        |
| ROY4908/09        | <i>MAT<math>\alpha</math>/a</i> <i>HML-tetO::LEU2</i> <i>HMR-LacO::TRP1</i> <i>CFP-Lacl tetR-YFP::ADE2</i> <i>htz1<math>\Delta</math>::KanMx</i> <i>LYS</i>                                          | Two-dot microscopy                        |
| ROY4942/43        | <i>MAT<math>\alpha</math>/a</i> <i>HML-tetO::LEU2</i> <i>HMR-LacO::TRP1</i> <i>CFP-Lacl tetR-YFP::ADE2</i> <i>smc6-9::NatMx</i> <i>LYS</i>                                                           | Two-dot microscopy                        |
| ROY4944           | <i>MAT<math>\alpha</math></i> <i>5GEB-a1-B5G::HMR</i> <i>LYS</i>                                                                                                                                     | Silencing                                 |

All strains are isogenic to W303 except when noted with an asterisk.

Table S2. qPCR primers used in this study

| Name   | Sequence 5' → 3'              | Amplicon |
|--------|-------------------------------|----------|
| GRO40  | ATTTATTAATGTCAAAAAGCCGCTGAGG  | 1        |
| GRO39  | TAAGACAATTGTGGACAACAAAGCAAA   | 1        |
| GRO51  | AAAACAACGCGTCATGAAAAAGAGTTA   | 2        |
| GRO52  | ATCACGTTCAACAAGGAACTCTACCAA   | 2        |
| GRO49  | TTATAAAATCCTCGCACTATCGCTGTT   | 3        |
| GRO50  | TGGGTAGAGATTTGCAACTATTTCTTC   | 3        |
| LOU191 | CCCGTCCAAGTTATGAGCTTAATC      | 4        |
| L95    | AAAACCAGGAGTACCTGCGCTTATTCT   | 4        |
| L97    | TAATACCTTTAAATGTTGAGGTAAATAGC | 5        |
| L98    | GCTAAAGTGTGTGGAAAAACATTTCTTGT | 5        |
| Lou201 | CACCAATCCGCATCTGCAGATTAC      | 6        |
| L96    | GGTAGAATGACCTAGAATGACCCATC    | 6        |
| R197   | GAGACCAGGTTTATTCAACCGGTAAC    | 7        |
| Lou120 | GGGTGTCACCGAATAACGTGAT        | 7        |
| R189   | ATCACGTTATTCGGTGACACCCAG      | 8        |
| R190   | GCCGTAAGAGATCTCCGAATAACGGTA   | 8        |
| L108   | TACCGTTATTCGGAGATCTCTTACGG    | 9        |
| L109   | GTGACGCACTGAATGTCATCAAAG      | 9        |
| R191   | CTTTTGATGACATTCAGTGCCTCAC     | 10       |
| R192   | ACCGGATATAGAAGAACTCGTCTTATG   | 10       |
| L104   | CATAAGACGAGTTCTTCTATATCCGGT   | 11       |
| L107   | CCTATTTGCGTATTCCTATGTTG       | 11       |
| R193   | CTAAGACGCTAGGACTTCTAAACACAGA  | 12       |
| R194   | ACCATATTGCTTAATTTCTTACTACTTG  | 12       |
| GRO61  | GAGTGTCGCGCATGATTAATACTTTTCG  | 13       |
| GRO62  | ATATGAAGATAAATGTGGACCAAACG    | 13       |
| QJK33  | TTGCAAATTGCTTGAACGGATGCCAAT   | A        |
| QJK34  | TACCGGATTAGAGGTTTGCTACTATATG  | A        |
| QJK45  | AATCACTACGTCAACATATCCCACG     | B        |
| QJK46  | GAGGCCGTAGGGACATATAGCA        | B        |
| QJK35  | GGCTGTACCATGTAATGAGCGG        | C        |
| QJK36  | CCTTTTGAGATTCTCACCAATGTTGC    | C        |
| R225   | GTACTIONTATTGGCCATTATTATCG    | D        |
| R226   | TTACATTCATTCTATGTGCGTAGAT     | D        |
| R227   | AGCTGAGTAACTAACTCTCATGGTACA   | E        |
| R228   | GAAGTAAGTTAACATAGAAGTCAAACAC  | E        |
| QJK47  | CTGCAGCATGTCCCCCTTATACA       | F        |
| QJK48  | GTGTAAGATTCTCGAAGTAAGCATCAA   | F        |
| QJK51  | CAAAACCGGCATTACCGCCAGAA       | G        |
| QJK52  | AACCAAGTGCTCCTTCAAAGTAGA      | G        |
| QJK49  | TCTGTTTCGAGACAAGTTGAGCAAGG    | H        |
| QJK50  | CCAGCTCGTTCAACCTCAAAGTGA      | H        |
| JK250  | CTTTCTCCACCACTGCTGAAAGAG      | ACT1     |
| JK252  | GAAGAAGATTGAGCAGCGGTTTGC      | ACT1     |
| R219   | GTTACGACGAAGCACGGCAAATTAG     | ARS315   |
| R220   | AAAACGGTCCGCTAAGAGCCGGTA      | ARS315   |

## Reference

Miele, A., K. Bystricky, and J. Dekker. 2009. Yeast silent mating type loci form heterochromatic clusters through silencer protein-dependent long-range interactions. *PLoS Genet.* 5:e1000478. <http://dx.doi.org/10.1371/journal.pgen.1000478>
